# Supplementary material for: Genome Sequence of Pineapple Secovirus B, a Second Sadwavirus Reported Infecting Ananas Comosus
Source: Research Square preprint supplement (doi:10.21203/rs.3.rs-1416846/v1), 2022-03-14
Supplement: Supplementary file 1 [file 9912b915349467645e6d4ba1.docx]

**Annotated Sequence Records**

**Archives of Virology**

**Genome sequence of pineapple secovirus B, a second sadwavirus reported infecting *Ananas comosus***

Adriana Larrea-Sarmiento1, Andrew D.W. Geering2, Alejandro Olmedo-Velarde1, Xupeng Wang1, Wayne Borth1, Tracie K Matsumoto3, Jon Y Suzuki3, Marisa M Wall3, Michael Melzer1, Richard Moyle4, Murray Sharman5, John Hu1*, John E. Thomas2*

1 Department of Plant and Environmental Protection Sciences, University of Hawaii, Honolulu, HI, USA

2 The University of Queensland, Queensland Alliance for Agriculture and Food Innovation, Centre for Horticultural Science, Ecosciences Precinct, GPO Box 267, Brisbane, QLD 4001, Australia.

3 United States Department of Agriculture, Agricultural Research Service, Daniel K. Inouye U. S. Pacific Basin Agricultural Research Center, Hilo, HI, USA.

4The University of Queensland, School of Agriculture and Food Sciences, St Lucia, QLD 4072, Australia.

5Department of Agriculture and Fisheries, Ecosciences Precinct, GPO Box 267, Brisbane, QLD 4001, Australia.

* Corresponding authors: [johnhu@hawaii.edu](mailto:johnhu@hawaii.edu), [j.thomas2@uq.edu.au](mailto:j.thomas2@uq.edu.au)

**PSV-B-RNA-1-MWP:**

ACATGGGAAACAAAGCGAACGTTTCTCTTCAGCGACCGTCACTTTCCTTGCGAACTTAATTGCGATCTTTCTTTTGATTGTCTCTTCGACTTGTTCTACTTCGTTTCTTGCTTAGCAAATCTGACCTGACCCTATTTAGGGCGCTAAACAGGCTCCAGTCGTATCGTAACGATCGTTTCATACCACTTCAATGGCCTCTCAGGTTGAAAGCGATTGCTTACGCTATGTTGTTACAGAAGAGGAAGCCCTCCTCGTTTTAGAGGCAGACTTCCTCATTTGCTATTTTGAGGAACTTGAACGCACTGGTAACGTGTGCGTGCCAGCTCCTGCTGGTGGCTCAGCTGATAATGATATCCGTCAATCAGTGATGGAAATTGTTAATAAATTACCAGCTGAACACCCTGCCTCCACCGACGTCCAACTGGCAGAATGTCTATTCTTCGATGTTGGTGAGGATCTGAGGAAAGGATTGGACAAGCATTTCTATCCTCATTTCGATAGAAATGATGCTGACTATAATCCACAAGGCATCCTCGGCAGTTTTGCTCAAGGTGCCTTCATAGAAATTGGTAGTCGCACTATTGGTCGTCTGATGGCCAAAGTGGGCTCAGCTGTGAGTCCTTTTTCTCAACTACTCGCTAAAATGGATATCATTTTAGACAAAGTAGTTAGTGCTTTTGATTGGCTTGCAAATATCGTTGATGGATGCATGAATTTTCTGACCTCACTTAGGGACAAATTCAAATCACTGATTCAGACTTGTCTTGAGAAACTTAAATGCTTTGCTGAACACTTTAGCTACTTAATGCCGTTAGTTTGCGGAGTGTTCTTTTCATCATGTTTCTTTTTTCTATTGAATAAATTTTTGAGCTATGTCGCGCCTTCATATGTTATGTCTTATGGAAGGTTGGTTGAAATAATATCAATTGTTGCAGCAGTCATTGGAATAAAGGAATTTGGTCAATACTTTATGACCATGGAATCTGATGCTCGGAAGTCCTTCATAAACGCTATCAAGAACTTTCTGGGCTTTGGTGATGTTGAAAGTGGCTTGGCTGTGAATGAAAGTGAGCCACAAGTACAATCAGGCCTCATGGACGTTGGACTGTTTGGTTGCCTTGTCTCCATGATTACATTCTTTGCAGATGAAAAGTTTCGGGTCGATTTCTGGGGATTTGCAAAAACTGCAGCGGCTCTGAAGAATATCTCAGATGGATACGACAAAGTTAGTAAGATGATGGGAGACATCACTCTATGGTTCTTCCAAAAACTTGGTACGAGTGGTATCGATGGAAGTGGTGCTGCACAAGCTCTCATGTTGCAAACTGGGATTGGGCTTAGTCAGTGGATGGAAGATTGTGAAAAACTCATAATAGAGGGCAACACGGTCACCCATTCAATGCAGTGGGTCTTTTCTGAGAGTCGGCGCCTAATTGATCAAGGAGCCGTCATTTCTAGTTATTTTGCTAGAACTAATGACGGCACGACTTTCCACTTGCGAGCGCGATTCGTGGCTGTGGAGAAGAGCCTAAAAGAATTTTATGGGAAAATCAAACAGGCTAATCTGAGTAATCAACATAGACTGACTCCTTTCACAATTTGCTTCATGAGTGAACCTGGAGTTGGAAAATCAACAGCTGTACGACCCTTTTGCGACACCTTCCTAGATGCTATGGGTGAACCCAAAGCTGATAGGATTTATACAAGAAATGGCGGGGACGCGTACTGGTCGAACTACATACGTCAGCCGTGTGTTTTGTTTGACGATTTTGGACAGACGCGCCAAGAAAATAATAGGTTTGATGAGGAAACCTTAATCCAGCTTGTTACTTGCAATCCGCACATGTTACCTATGGCTGCCGTCGAGGAAAAAGGCAGGCCCTTTGATTCGAAATACATAGTCATGTGCACCAACAGGGAGTACGCTCACTCTGAGGCTGATCTGGCTGATCAAAATGCTTTTCTGAGACGACGAAAGCTGCTGTGGAAGGTTGCGAGAGATGATCGCGTGGCTTTCGACCCCACATGTTGTTGGAAAAATCTTCTATTTACTAGAATGGATTCTCTCCATCCACGCCGCCGGCACGTTGATCAGGTGACCCTGACTTTCCCAGACATGATTGCATATTCAGCAAACCAGGCTAGAGCACATTTTGCTCTAGAACAGACAATGTTGGACAGCATTTCGACCTGCACGGACTCCTTTCATCTTGAGGAGGACCAAAATGGCCACTTTCGAGTGGTTTTTGACAACGTGGATGCTGAGGTCCACAATGCGGAAATGAGGAGGGCCAATAATCCCAACATTGAGAGGTATAGAGTCCAGAGTGGAGAATCTTTCACTTATTTTAGTTGCCAAAGACCACTTAGTCAGGGACAACATTGCCCAAATTTTGCAAATCACGTGGACGAATTTAATTCATGTACTCTTGACACGATTGGGGGCAAAGTTTTCTGTTCTAACGGGGGGGTTTTCCCAAGTGAAAGTGTTCAGTGGTCCAGTCATGAAAGTTATTTCATTGACAATATGGCTAAGTCAACGGGCTTGTTCGAGGTACAAGTGAATTTGCTGGCCAGTTTATTGATGGACGACACAAATATGGAAGAATTCATGGACTGGAGAAGGAATGTGCTTTTTGACGATATAGTTGGAGATGGTATTGACCCCCCTGCTTCTATCCGCAGTAAGAATCCGGATGTTCCGGATACGGTGTTCCAAGAATATTGGTCCAAACTCAGCGATCGTTCTCGATACTTGGCCATTATGTGGCGAGATCTCACGCCGAAATCATCACTGAAACAAGCCATAGAAGGATTCAAGGAAGCAATCTCTGGGATTAAATGTGTACGGCTTTGGGAGTCATTGCCCTTTTGGCTTAAGTGGGCAATCGGATTTTTCGGCATCTTTGCGGGAGGATGTGTTGTCTATTCTTCTCTCAGGTGGCTCGCTGTACTTGGCCAACAGACTGGAGTTAAGCTGTTGTCCTATGTTTTAGGAGCAGATCCTTTCCAAGTACAGGGTACTTCATCAGGCGGTGATGAAAGGATCAACCGCACGCGACGTGTTGCTGTGCGAGGTTTCAGAGCACAGAGTGCTGCTTATGAGTCGATCCCGCATCCTGACGCATGGGACAAGTGCAAGAAAGCAATGATTCGAGTTGAGGGGACGGGCATCAAATCACACAGACCGTTTGCCTTCTGTGGTCTGATGATAGGTCCACGAAGATTCGTGGCCCCTGCTCATAGCGTTGTTCTGATGAACTTTGGTGTTTCTATGATGGTGACGAATGGTGAGGGCATGGGATGTACTTTCTATTGTAGATATGCACCCACCATGCTTGATGAATACCCAGAGTTTCCGGGAAAAATGAAAAGTTTGGTTGTGATGGAGTATTCAAGATTGACGCCACCTCTGGCTTATTACAGCAACATAGTAACTGATTTTTCCCTGGAGGTGAGTAGGTGTGTGCCGGGCTTTATCATGCCAAATATCAACCCTGACAGCGCTGATTTCCCACATGTCACCGAATTCTTTAAGGTGAATAGAGTTGACGACATTGCTGATGGAGCCTCAGGCATGACTTGGAAAGCTATTAAAACCTTCCATGCCAAGGAGGTCGGGAAAGATGGAATGTGTGGACGTCTCGCCCTAATAGACAGGAATAACACTCTGCAAGTGGTTGGAATGCATTGCTATGGGCGACCATCCGACTCGATTTTCTGTGACTTTGAAAAACATTTTGTTGTTGAAACTTATAAAGCACAATCTGAATATAATCAGTGTTTTGAGAGAACTCAGATAACTGAGATGGTGGATCTTGTTGGCACACTTGATGTTAGGGTTCCACGCTTAGAGAAAAGCCAGATTGAAAAATCCTTAATTCATGACACTTTAAAGGAAATGTGGCGTGACCCTCTAACTGAGCCTACAATTTTGTCTCGTGTGGATCCTCGCCCGCCCTATTCATATGATCCATACGAAATGGGAGTGAGGAAGTTTGATAAGGAGGCAGGACCATTTGATTTGAGAGAAGGGACAGAGTTCAACAAAGCCCTGGCTGATATCAAACAGAGTTGGTTGGATATTAAGCCGGAATCGTTTAAGATAGAACCGGTGTGTTCTTTGGATGTCGCCATTAATGGAGTCGATGGAATGCCCTATGCTGAAAATTTTCCGATTAGCACTTCAGAGGGATATCCTTATCTGCTCGAGCGCCAGCATGGAGAGAGTGGAAAATATAGATACTTTGAAGAGGATCTATCCGGAAAGAGGAAACCCAAGGGAGATTGGGTTAAGGACGTTGATGAGATTGAGAATCTGTGTGCTTCTGAAGAACTTGAAATTTTCTCCATCGCATGTGCAAAGGACGAGAAAACCAAATTGGCCAAGGTTTACGAGACTCCAAAAACACGAATTTTCGAAATCTTGCCCTTCACGTATAATCTATTGGTCAGAAAATATTTCCTGTTCTGGATGCAGTGGATGATGGAAAACCATATGAATCTTCCATGCAAGGTTGGTTTAGATTGTTTCTCCTATAACTGGGACATTATGGCATCTCAACATATGGCCTTTGCGAACCATTTTAATGGTGACTATTCGGGTTTTGACACGAATACGTCACGAGACATGATGATGAAAATTTGCGATATCATTTGCGATTTTGCTGATGATGGTGTTCGGAATCGCACTATTAGGAGGAATCTTATATGGGCTGCTGTGAACAGGAAATTGATAATTGGAGACAAGATTTTCGAAGTTAGAGGTGGCACCCCATCCGGCTTTGCTCTCACTGTGCTGATTAATTCTGTTATGAATGAATGGTTTTTGCGAGCGAGCTGGTATGCCATAATGCGTGTTCAGGAACCAATTCTGGCCAACAGTCGAGATTTTAGATCTCATGTGCGCCTTTCTGTTTATGGTGATGACAATGTTGTTTCCATGTCGAACCAGGTTGTCGAGCTGTACAATCTTGTAACCATTTCTGAATATCTCAAGCAATTTGGCATCAAATTGTCTGATGGTGCCAAAACTGGCGTACTTAAGAAGAGAATGAATTTTGAAGAGATCGATTTTCTCAAAAGAAAATGGACCGTTGGAAACTTTGGTTGGTTTCATTGTCCTCTTGATCGGACTTCTATCGAGGAACAATTGTTTTGGATAAAGAAATCAGATGACCCTCTGGCCAGCGTTCAGATGAATGTAGACAATGTTCTCCGTGAGTCATTTCATCATGGTAGAGACTATTTTGATACGATAAGAAGGGTCATCTCGAAAGCTGCTAATCTCAAAGGACTGGAAATTCTCCTGTTAAGTTTTGAAGATTGCGCAGACATGTGGACCACACAGAGAACTAAAGGCAATGCCAATGTTCCAGTGTGTTTCGATTTGCCTTACCTGAAGAAGCGCTATTTGGAGACCCAAGTGCGTGGCCTGGGCGAAAAGAGATTTGATCCGATTTATGGTATGACCATTGCGCGACTCAACAATTTTGATCCTAAATGGCGCCAAGCTGATAAGGTCGTGATTCTGACTGATGGGGGAGGTTCCTATGTTAAACACAATGGAACTTTGTGTTTAGATATCACTACTGATGGTGGTATGCAAATGAGAAAACTTCGAGAGTACATTTCCAATGGGGACTTTAGACGCTGCTATGTTACTCACCCCTCCAATGTTGCTGCTTGTGGGGTGTATGCACTTCTGACTTATCTCTTTGTGTTTCCTGAAGAAAAATCGATGTTGCATGCTTGGGTGGATTTGCTTGATGAAAATGCTTATAAGCAATTTATCAAACTTAATTCCTTCGTGTGAATATTGTGTGACTCTTGTGTCAGCTAGTGGTTAGGCTACTGTGTGTGATTTCCTAGCCACCATATTTAAATAAAATTGATGTGTGCTTATGTTTTTGAGTGTTTAGTGTGTGATGCTCTAAATTTATGCATGCTTTCTACC

**PSV-B-RNA2-MWP** GCAAATCTAACCTGACCCTTTGGGGTGCCAAACAGGCTCTAGTAACTGCTATCTATGCATGATGTCCATGTGATCATGTCAATGGCCTCTCGATTCCATGGGACCCAGCATATATAGGAGGTATAAGCTTGCTGCAGGTAAATGCGATTCATGCAGCTTCTTCAAGTGGTTCTTTTTCCACTTTGTTCATTGGTGTTTTGGTCTTTCGGTCTTTAAGCCTTATAAGGAGGTTTTTGAGGATTATTATTATTCTGCCTTAAGAGCTTCAGATGCTCGTCTTCGAGTCAATTTGAAATTTAAGAAAACTCCTGCTTTCGACTTGCTTGTTCTATACGTTGGACACAACTATTTCCCTTGTAGATTCTGTTGGTTTCATCAACATTATCATACTATTTTCCGTTGCCAACTTAAATCTGTTATTATGTCTCAGACAAGGTCTGTGCAGGAGGTTTTCACTGGTGCTGGCCGGCAGCTTGGAACTAGTGCCTCTAATATAGCTCGAAGTTTGAGCCAGGTTGGTGATGAGACCATTCTCAATACTGCTTCTCCAATCGTAAAGATGTTTGATGAAGCTGTTAGAAACAAAAACTTTCATGTTCTTCCGAGGAGAGTCCAACAAATGAAAGATGTTCTTTTAGGAGTTTCTAAGAAATATGTCCATTTTGACATTGTCGATGCCACCACTAGCGCTGCTGTGGAGGACGCAGTCGTTGAAACTCCGATCCCTCTAGATCAATATGTTAATATTGATAAAGCTGAGGAATCATTGCGAAGTAAAGAGGAGAAGAAACTCGACATTGTTAATGGAAAAACATGTATTGTCGAGGCCATTGCTCTGCAGTCAACTTCTAATACTCCTGCAACAAGTGGTGGCGTTGTTTTGACCATGGCCGTTGATAGTAGGGCCAACAATCCTGAAGATGCGATTCTTGGTGGGCACATACATGTTGCCAGCCGTAGCGATACAGCTGGTAGCATGTTTATGCCATTTTTCAAGCTCAATACTAGAGATCCATATTTGTCAACCGCCCTTAAAATCATGACAATTAGTTCGGGATTTGACATGAAAGAGGGCTCCATAGTGGCAACTATCAAGCCACTGGTTGTTGGTGAAATAGTTCAAGACCCTCAATATACTACCATCAAGAAGGGTGTTTTGAAAGAGATTATGAAAGCTGGCCCTGTGACTCACACTGATCACTGCTTACCTATTCATCCGCGATTGCCCGAAGGACCACGCAGTACTGAGATTGTGGTACCATGGGAAAGTGCTACGCAGGCCTTGCTTTACTCGCACACTGCGGATGGAACAAGTGTATGGAAGAACGCTACAAAAGGAAAACAGAGCGTTATCTTTGAACTGCCGCGACATCTCACCAGTTCGCGGCGCATCAATCAAATAATCGCTGAAACCTCTGATCCAAATTTGCTTGGAAGGACTGATGTTAGAGAGGTTTCTGATAATTATACTGAACAGGGTTCCGGCGACAGAGAGGAACACATGCCAACTGAGGGCTCAGGGAGACAGGAGAAATTCGACGGCTTGCCTCATGCTTTTACGCCTGAGGAAAGCATAGTGAAGAAAGATGATGTCCCTTCGATGAAAGATAGGGGAGGAGAGTATGGTTCTACATACGTTTTGGAGGATGACAAAATTCTCTTCTCTGCACGCTATGTGGTGGACAACACAGCAGAGACAGGAGCCAGCCTGGTAACTGTCCAACTTATGGACGATGTTCTTTCGCGTGGGTTTGAGTCTGCTGTGGCACGATTGGCCCTTATCATGCCAATTGTGGAACCAATCATTAAAATAAGGGTTACTTACACCATACCCTCACTGTGTAGCGTGCCACTTATTCTTTCCTGGGACGAGTCTGGGGACAAACTAAAGAAAGCCGTTGTGCTTGAGCGAATCCTCAATCAGCCGTCCATAATAATGAATTCACACAGTGTTGTGACAAGTCATGAGCTTGTCGTACGACCAGCTGGTCACACAGGTAGGTTCAACTTATTCGCATCAGGAGCTGAACGAATGGGAGCTTTCCACATAGTTTCGTGTGGGCATAAGCTCAAAGGAGACGTTAAGGTTAATCTAGCTGTTGACATTCTGTTTTGCAAGAATACCATCATGATGCCATTGGCGCATCGACCTGATAGGCCCATTGCTAGCATACCAAACGCAACGTTCAAAATGCTAGAACGAGTTTCAATGGGTGATGTGAATTTGCACCATGTGCTATCACTACATAAATTCACGGATAAATCACCAACTGGTGATATTTATTTAATTTCGGTAGTACCTGGAATTTGTTCCATTTCTGATAAGGGGACCAAGTCATTCGTCAGCACATTTGGCAAGATGCTGACAATGTGGAATTTTTGGCGCGGGGACGCAATTATAGAAGTGTCATGCGCAGCCAGGAAAAGCATAGCTGGCTCATGCACTTTCTTTGTGGTGCCACCAGGGGTTGAAACTGCCCTGCTGTCGCCAACTATCCTCGCAGGTTTTCCTTTCTTCCGTGTCGATTTTTCCATGGATAAACCTGTCAAATTCAAATTCCCAGTCAATAGTTGGCTCAATTGGTGTGTAACGCAAGGAATTGATGACTTTAATGCTGTGGACACCAACAACTGTGAGAGTTCCCTCATTATGCGTCTAGATCAGGCTCCTTATGATAATATGGGGGATGCTGTGGAAGTGCTCATGTGCACACGCATAGTAGCAGTCAAGAATTTGGAAGTCTCTGAGAGAGCTTCCTGTGCAAAACAAAAAGGGGCAAATTTCGCTAAAACGTTTGATATGGGTCGAATCCTCCATGACCAAGTGCTGACTGCTTATAGAGCACAATCTGAAGTCCCCGGATTTCAAAATGAGGGCTTTGCGCAAAGTTTGGTCTTTTACCCTCTCGAAGTTGCTGAGAATGGAGAGGGTGCTCGTTCAGTTATGTTGTCATTCCCTGTTTGTTTCAACTATCGGGATGACATGTTTGAGAGGAAAGGTCAAGGGAAAGCTGGACTCGTTTACATTGACCATTTGAATCCTTACCACCAACTATTTTCAGGGGTCTCCTATTACTCGTGCGGCATTGAAGTGCTCATCTATGTAGAACACGAGGATGGCTCCTCAGGCAAGGCCATTGCCGTTTTCAAAAACGGCTCAATGGAAAATCATGTTTATGGCCAGACCACTGCAACAAATGATGGAAATTATGGTGGCGGAGTGTCAATGGACTATATGTCAGCAAGTGGTGCTCTGTACCTTAGGATTGAACCACGCAACTTCAATTGCAGGGGACGCGTGAGAACGAAACAAAGTCACAGATTCCTTGACACTTATGGGGTTTGTCACGTCAGTGTACCTCCTTTTGATGTGGTCAAATGCATCAGAGTTTTCACTCGACCATTCGGGAAGATATCCATTTATGGTGTGCGAACTCCCGAGATGGATGTAGATGCTAATTCAGGGAAGAGAAGATGCTCATGCGTCTATCTCACTAATTCTGATGCAAATGTTGGAGGGTACTAGAGCTGCGATGATTTGACAAGTGGTTGCGACAGCAACAACTGCAATAAAGACTGAATGATTTGCTCCTTTCTTCAGTCACGTGTTATCTGCTTCTTTATCATTATTATTGTGCTTCTTGGATGATGTTATTTCGTTGTGCGTGTGCTTGCTGCTTGTTGTTTCTTTGCAACTATAATGGTTGTGGACTCTTGTCCATCCATGAATAATTATTATTATTATTGGTGTGTATTTAGTTTTGAAATGTTTGTGTGTGATGTTTTAAATCTATGTATGCTTCCTAAC
